# Supplementary material
Source: PubMed Central journal article supplement (PMC4609531)

Supplementary Figure 1

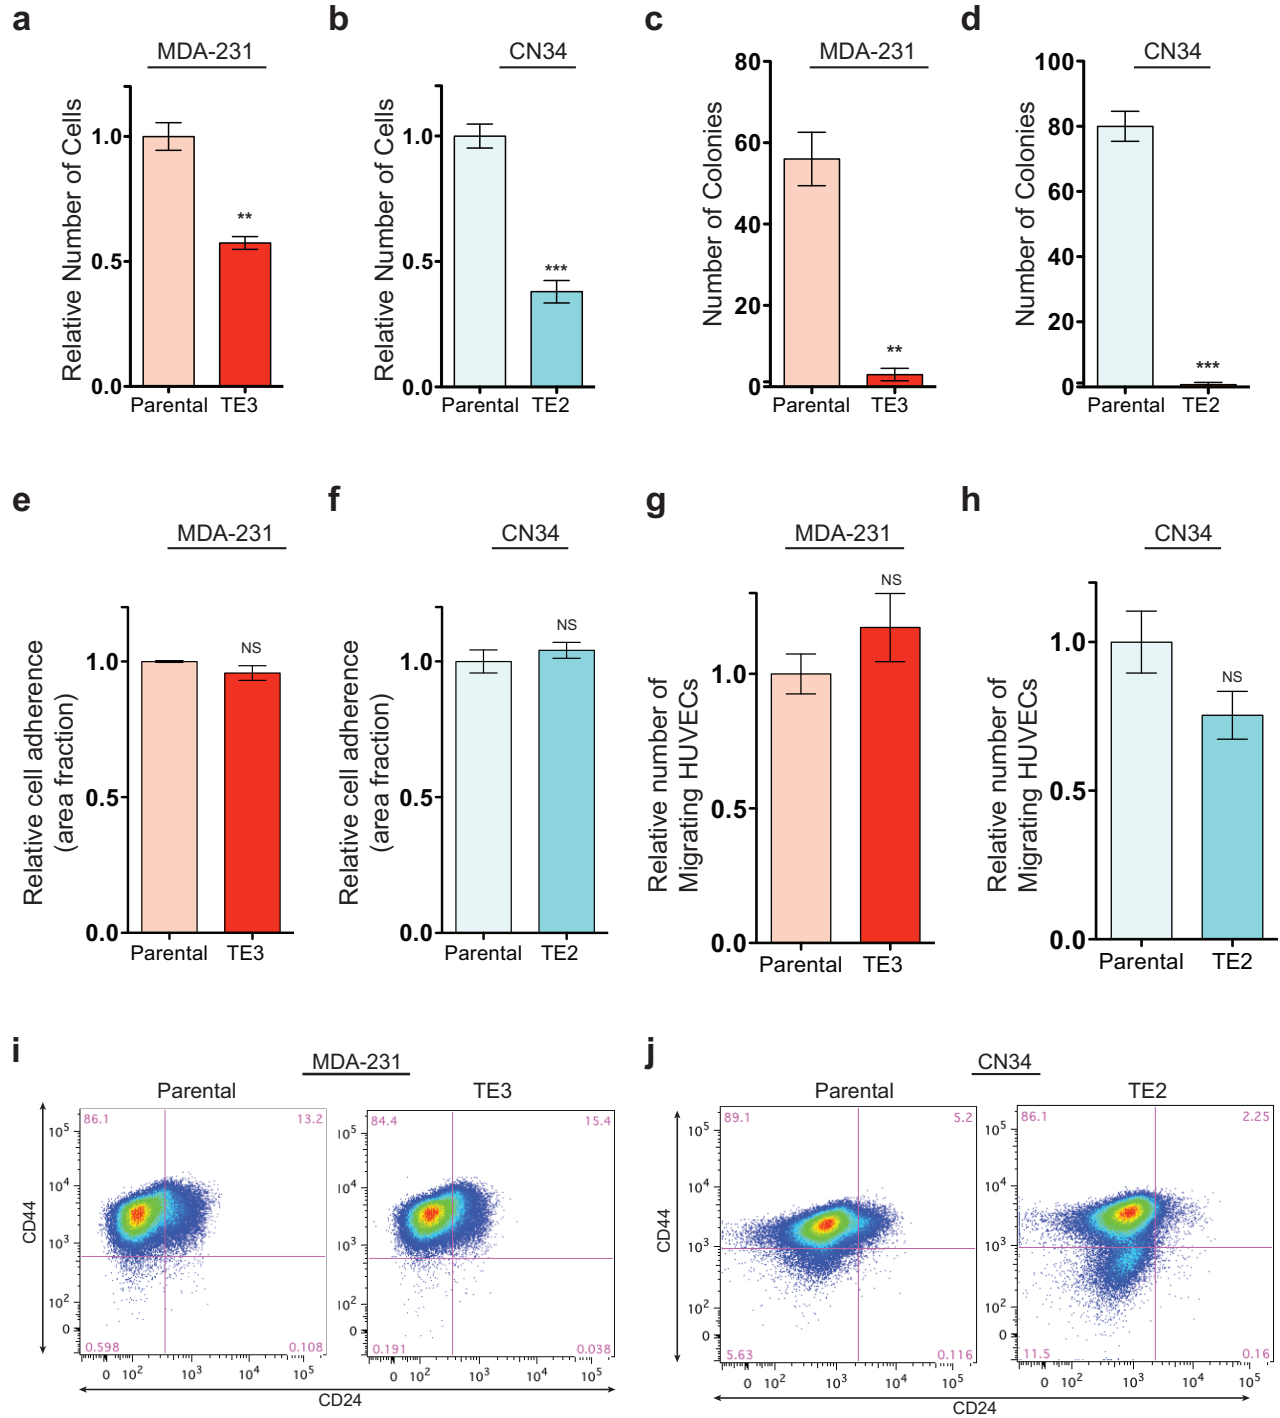

Supplement: NIHMS669417-supplement-2.pdf [file NIHMS669417-supplement-2.pdf]

Supplementary Figure 2

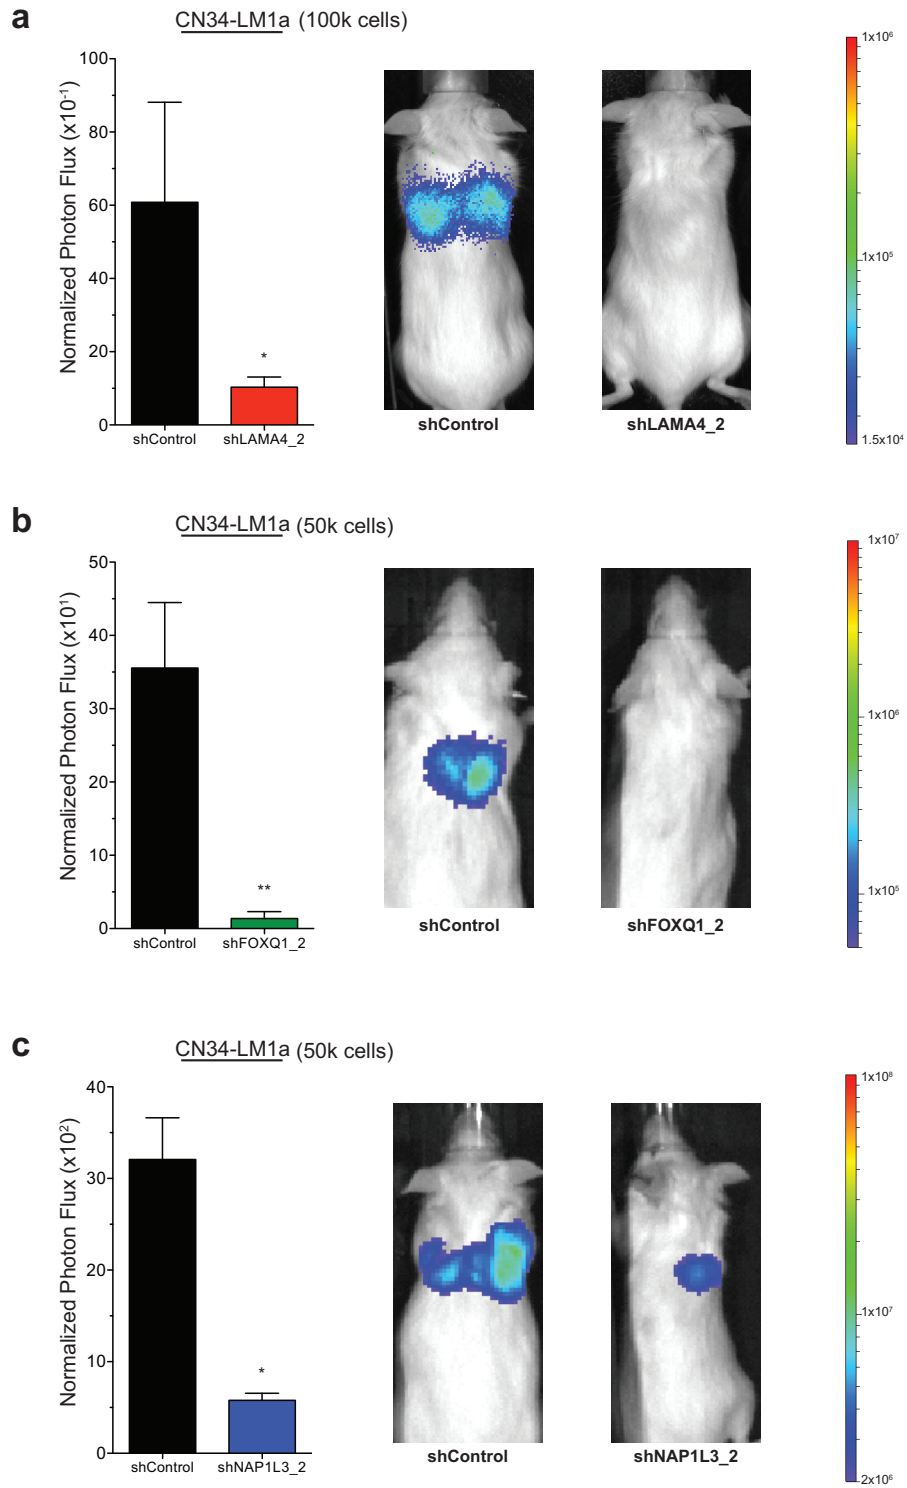

Supplement: NIHMS669417-supplement-3.pdf [file NIHMS669417-supplement-3.pdf]

Supplementary Figure 6

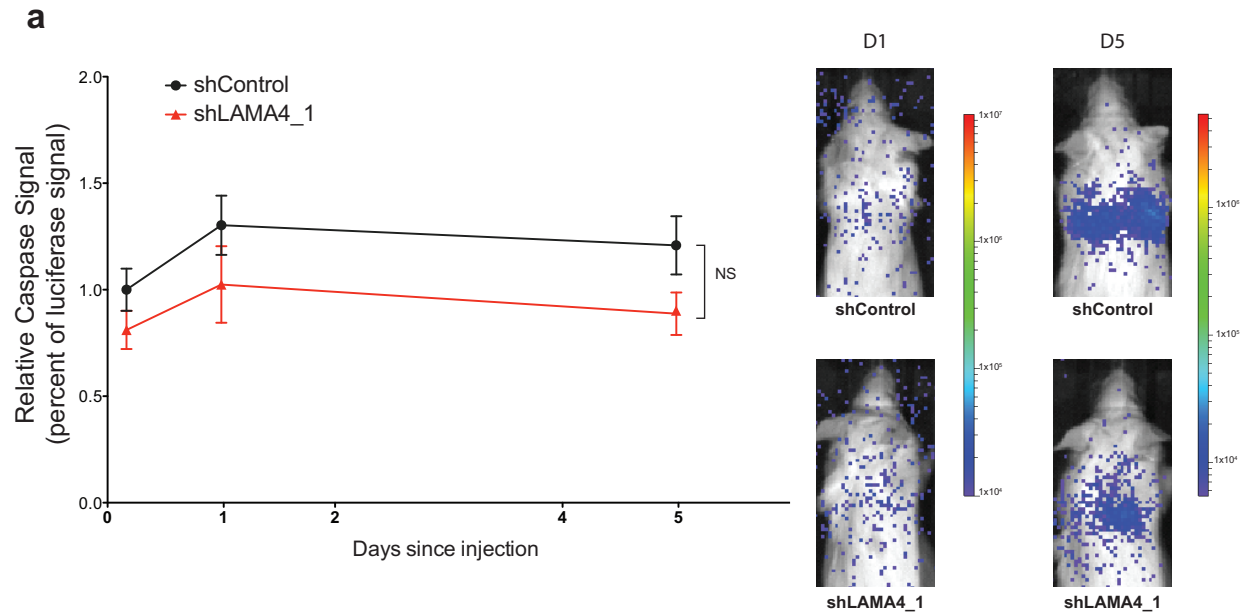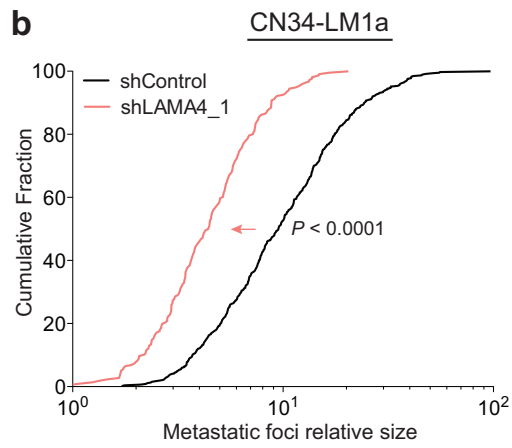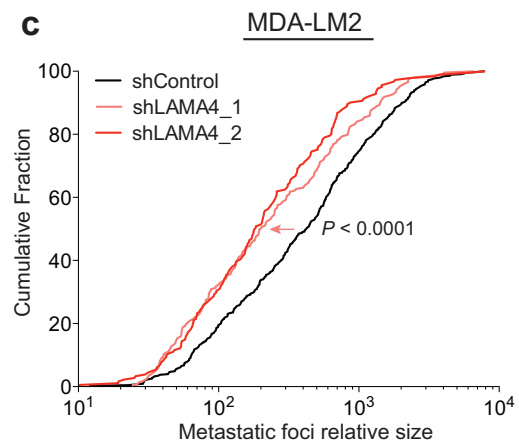

Supplement: NIHMS669417-supplement-7.pdf [file NIHMS669417-supplement-7.pdf]

## Supplementary Figure 8

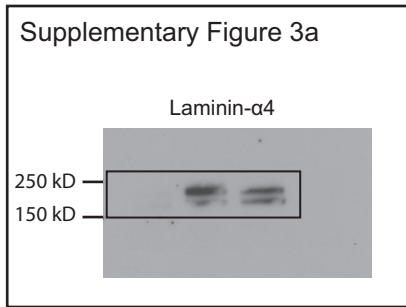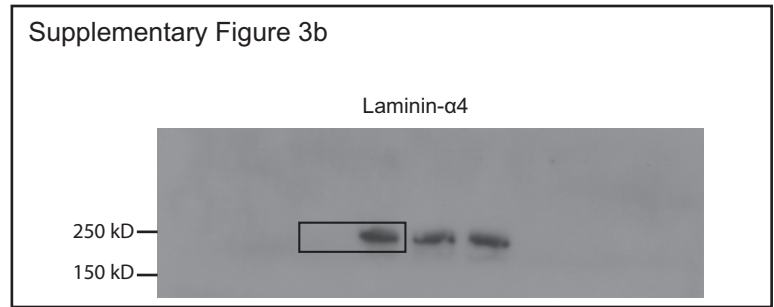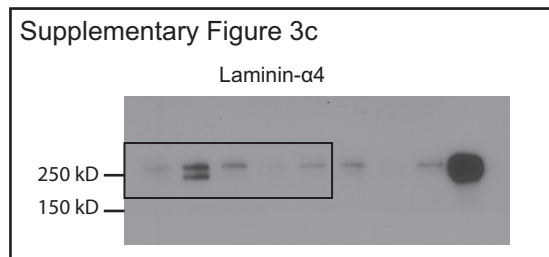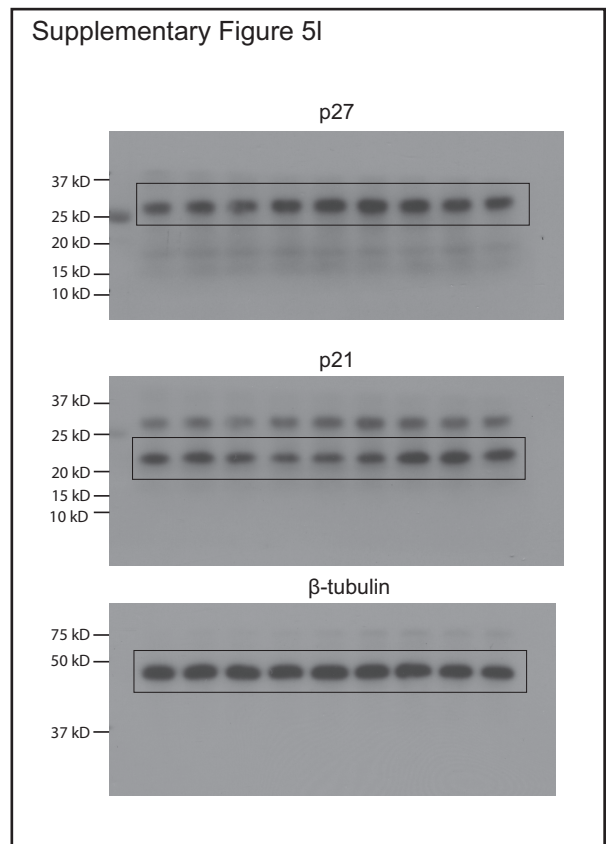

Supplement: NIHMS669417-supplement-9.pdf [file NIHMS669417-supplement-9.pdf]
